# Supplementary material
Source: PubMed Central journal article supplement (PMC8595812)
Supplement: NIHMS1738217-supplement-12.pdf [file NIHMS1738217-supplement-12.pdf]

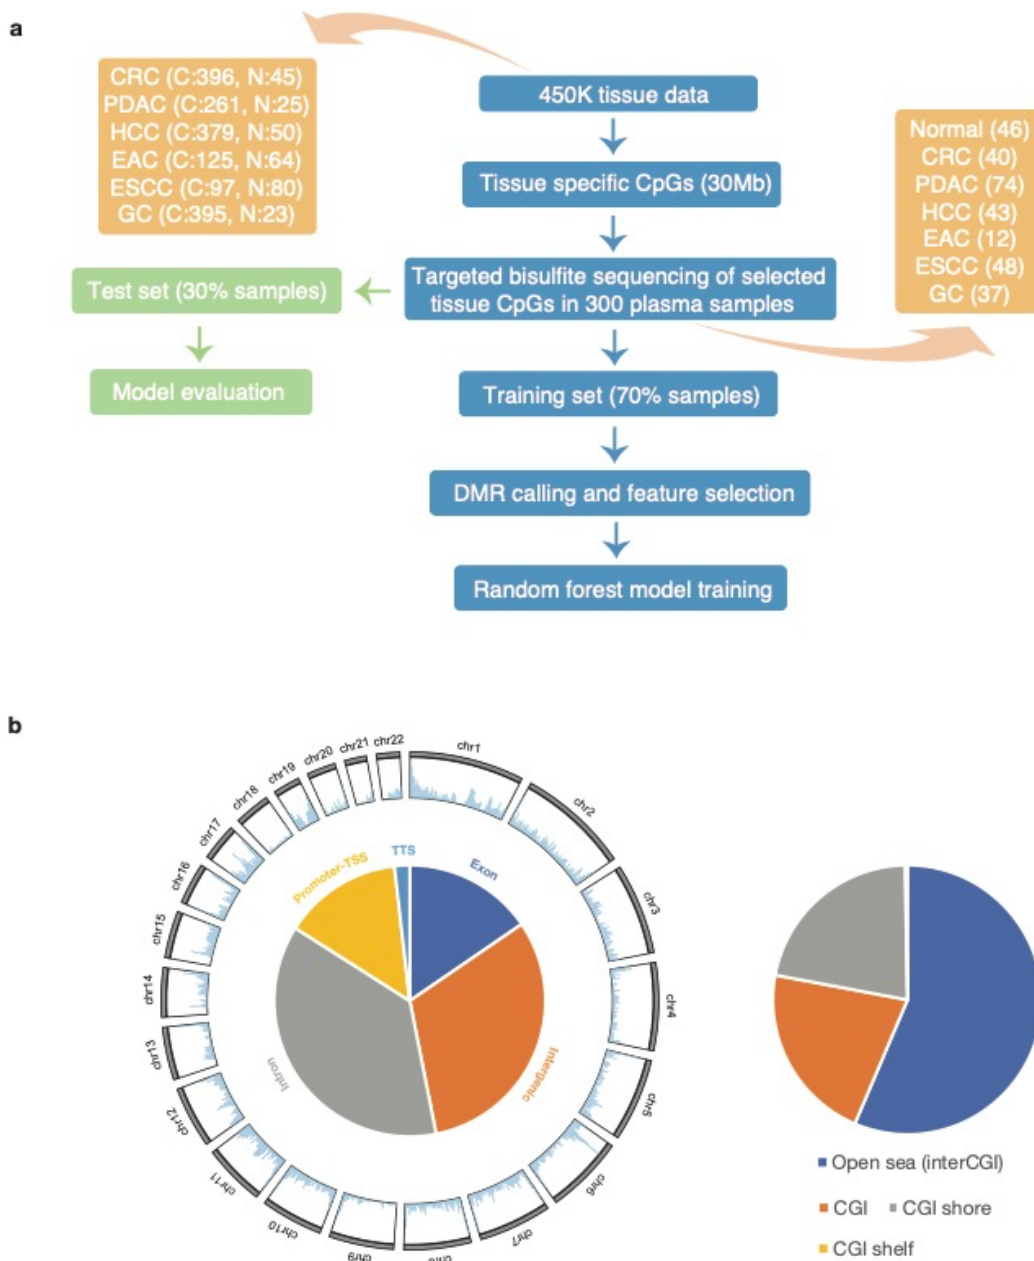

**Fig. S3. Workflow of model training and test for GI cancer prediction.** (a) Initial markers discovery was conducted with 1653 GI cancer and 287 normal tissues. Targeted bisulfite sequencing that covers the initial selected CpG sites was performed on 300 plasma samples, including 254 GI cancer and 46 normal samples. GI plasma samples set was split into training set (70%) and test set (30%). The training set was used for calling differential methylated regions, feature selection and training random forest prediction models. The test set was used for model performance evaluation. (b) Annotations of panGI markers selected from GI cancer tissues.
