# Supplementary material
Source: PubMed Central journal article supplement (PMC8595812)

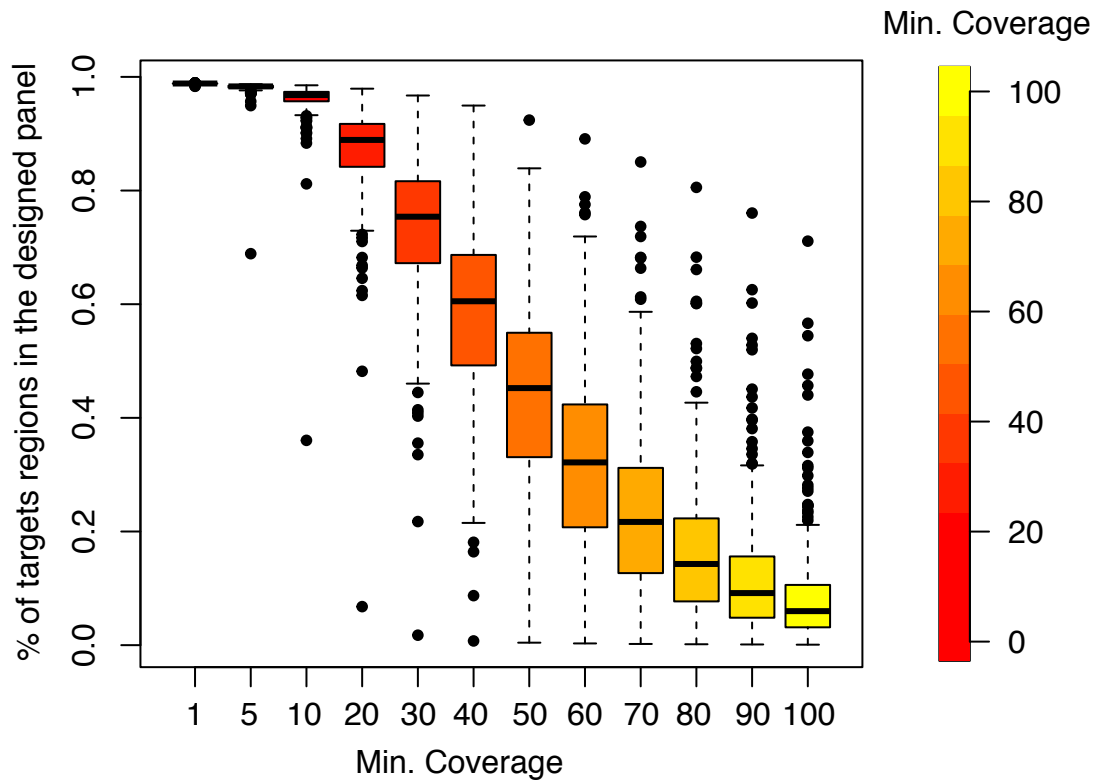

Supplement: NIHMS1738217-supplement-10.pdf [file NIHMS1738217-supplement-10.pdf]

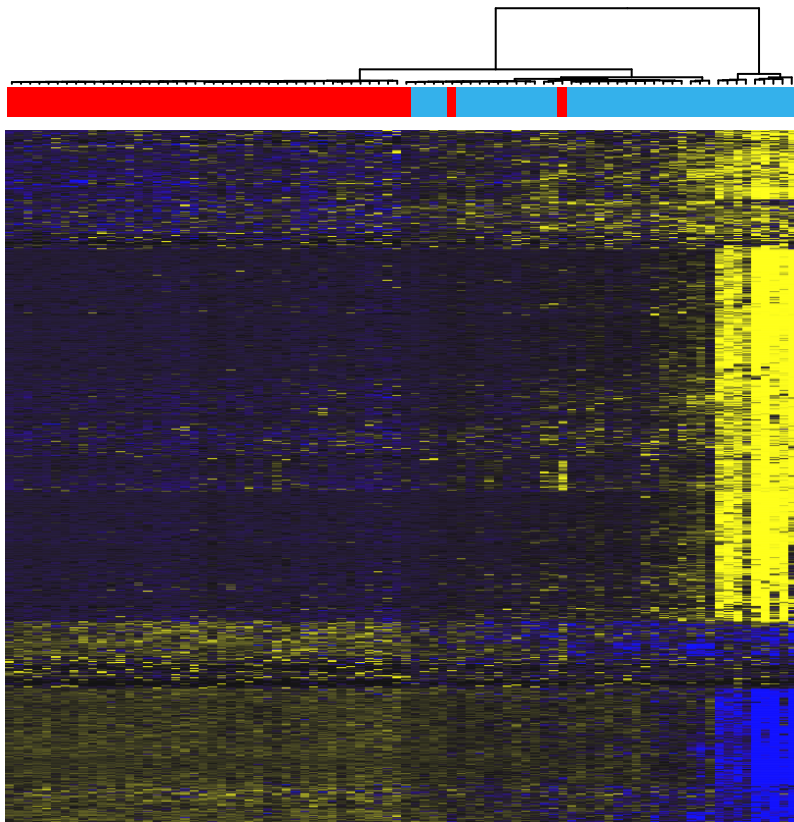

Normal  
CRC

Z-score

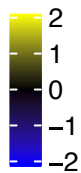

Supplement: NIHMS1738217-supplement-13.pdf [file NIHMS1738217-supplement-13.pdf]

PDAC prediction accuracy

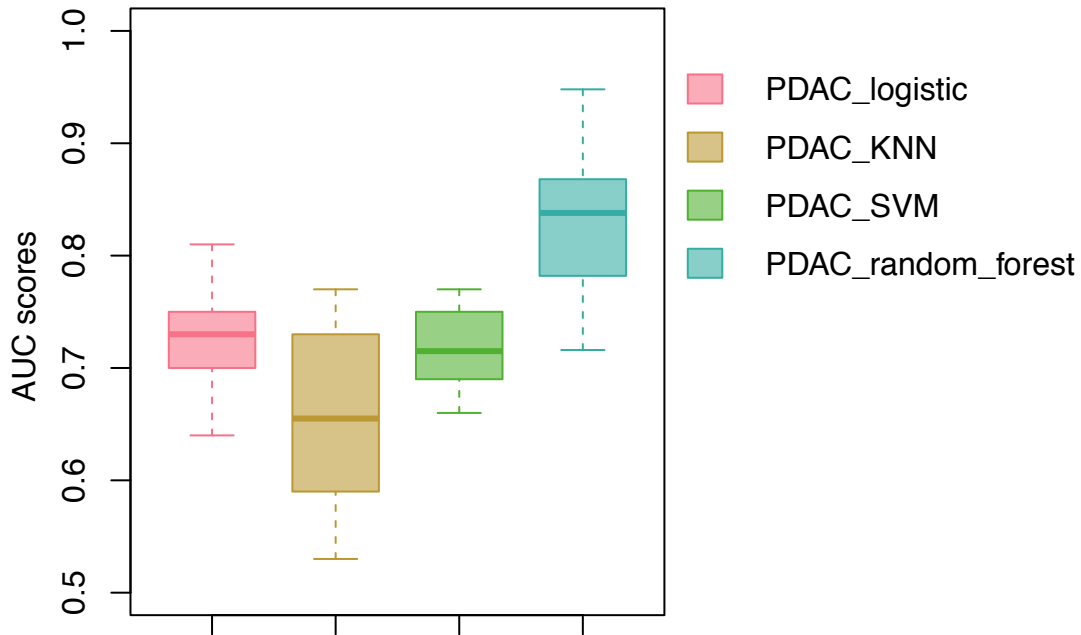

Supplement: NIHMS1738217-supplement-19.pdf [file NIHMS1738217-supplement-19.pdf]

# CRC

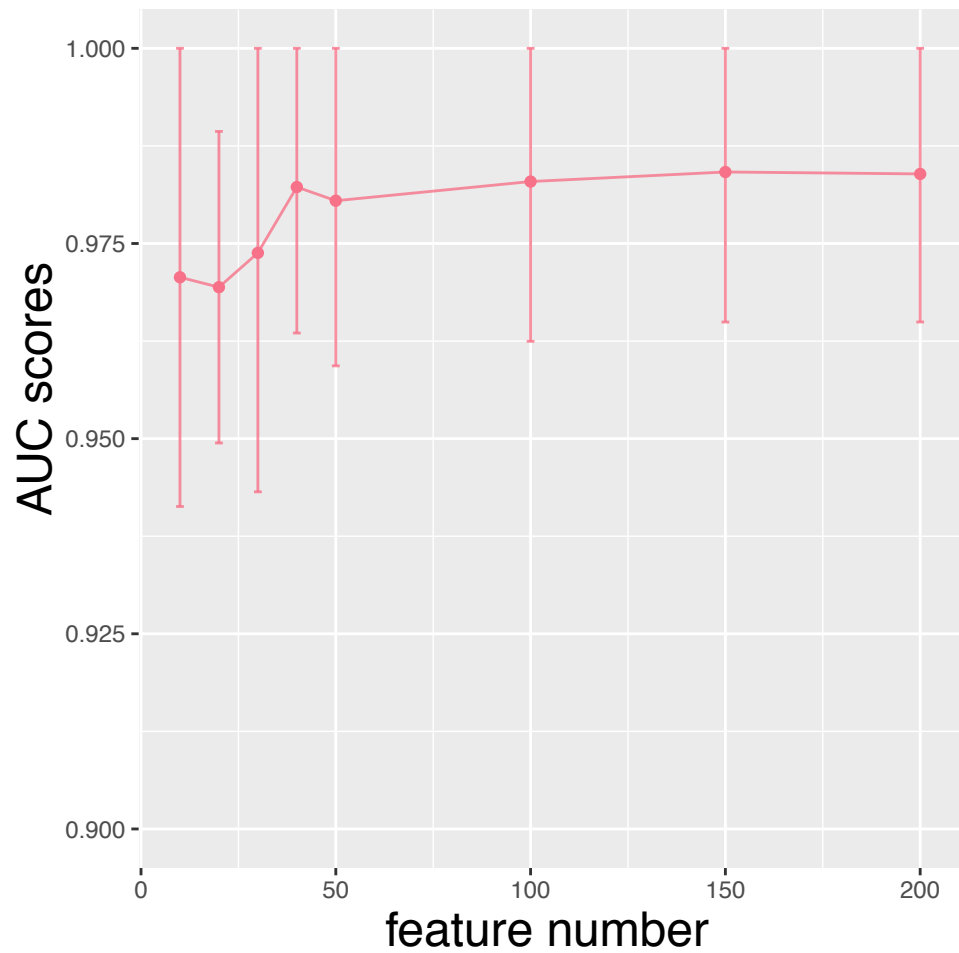

10 DMRs

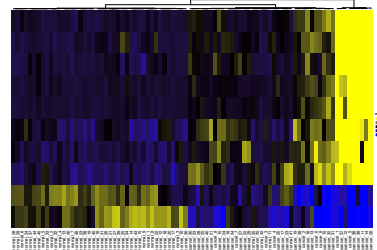

50 DMRs

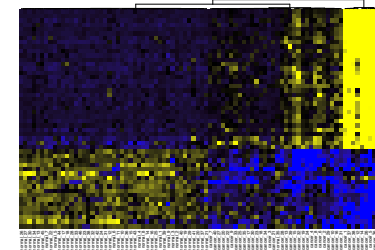

20 DMRs

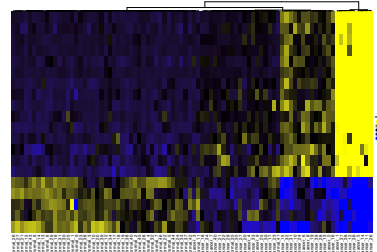

100 DMRs

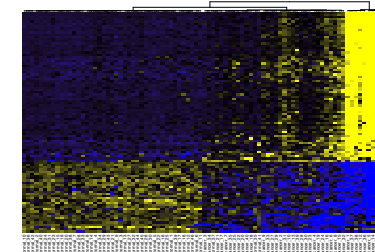

30 DMRs

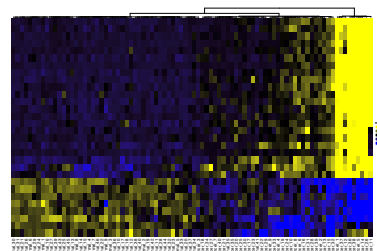

150 DMRs

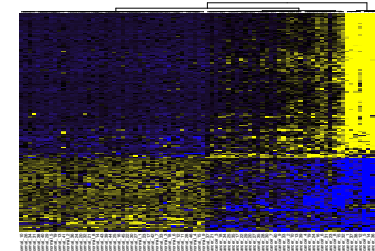

40 DMRs

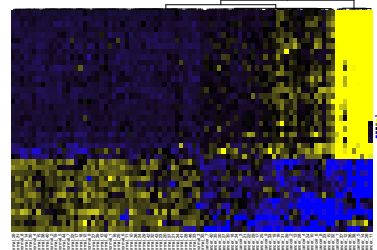

200 DMRs

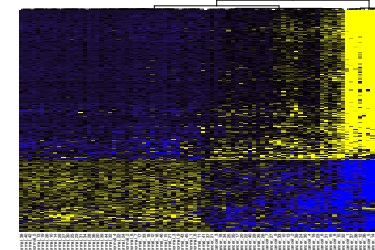

Supplement: NIHMS1738217-supplement-20.pdf [file NIHMS1738217-supplement-20.pdf]

# GC

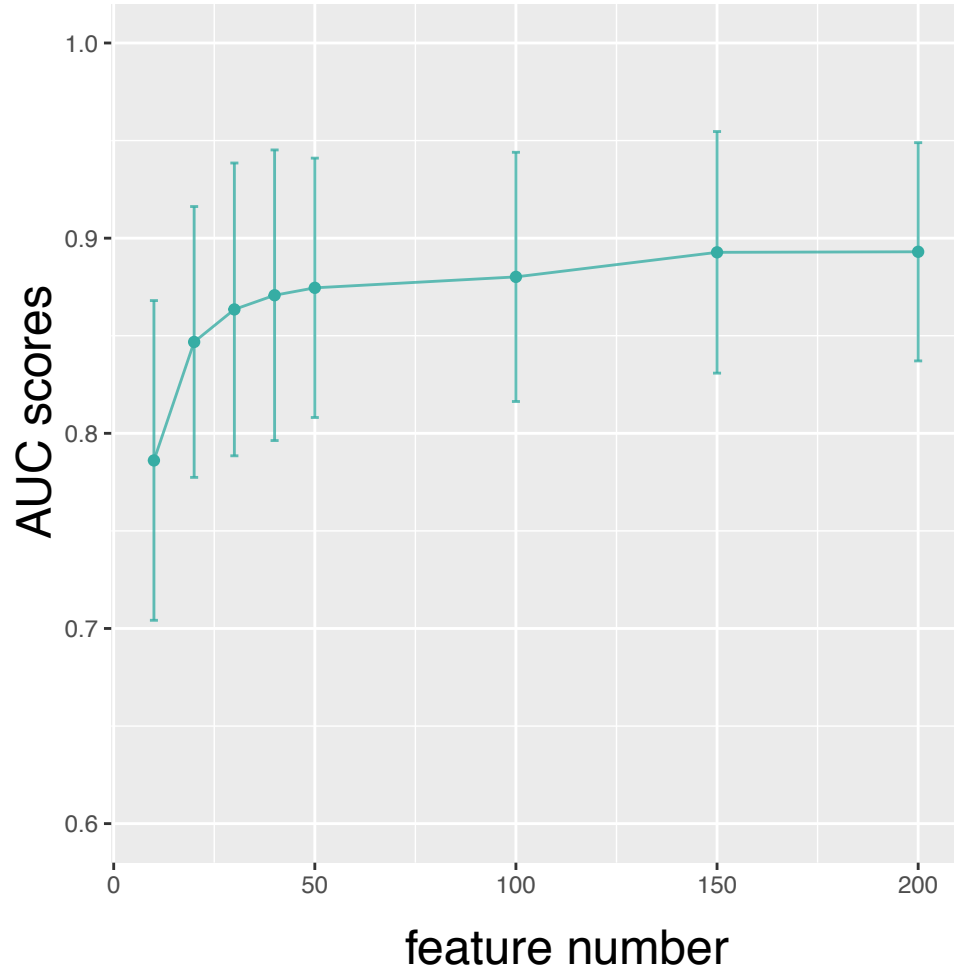

### 10 DMRs

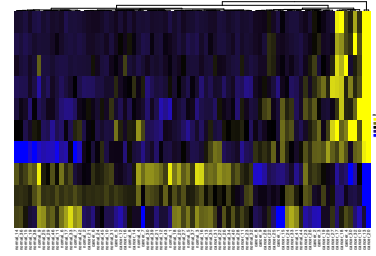

### 50 DMRs

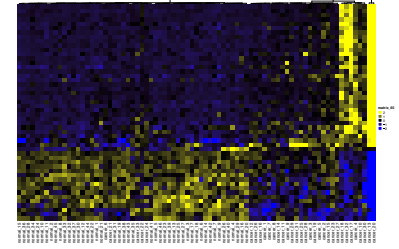

### 20 DMRs

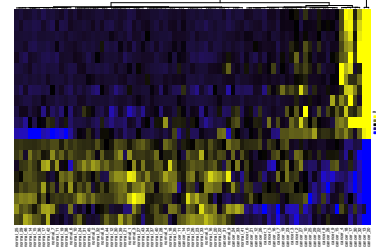

### 100 DMRs

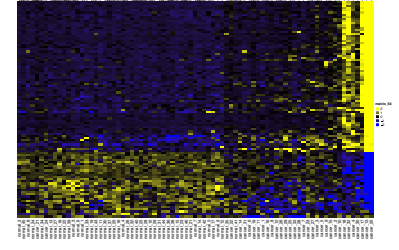

### 30 DMRs

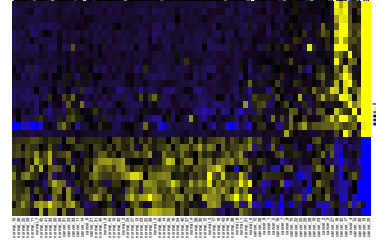

### 150 DMRs

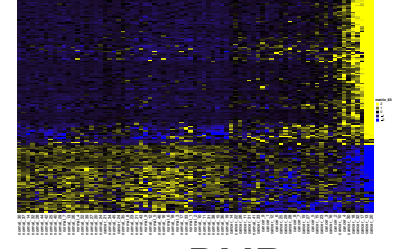

### 40 DMRs

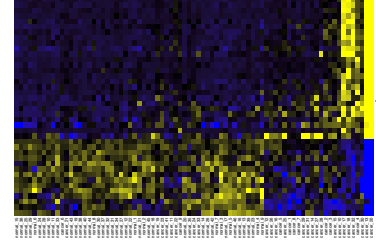

### 200 DMRs

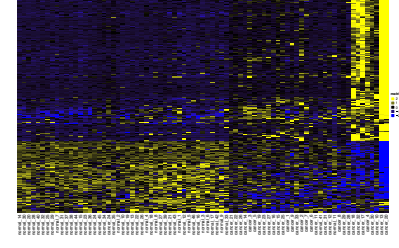

Supplement: NIHMS1738217-supplement-23.pdf [file NIHMS1738217-supplement-23.pdf]

# EAC

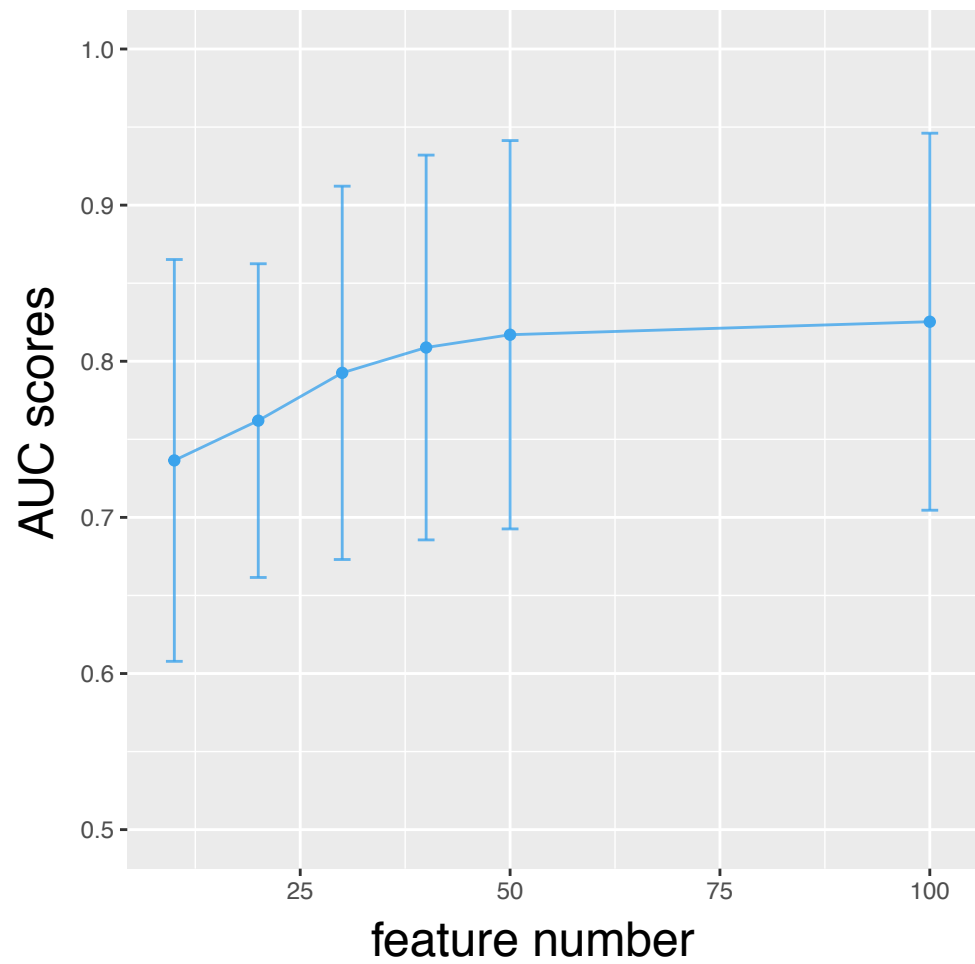

### 10 DMRs

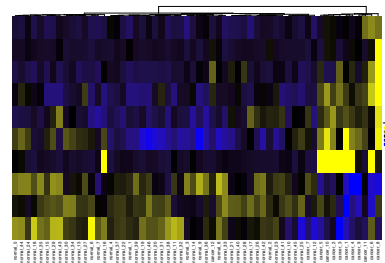

### 40 DMRs

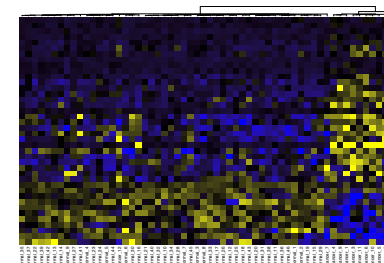

### 20 DMRs

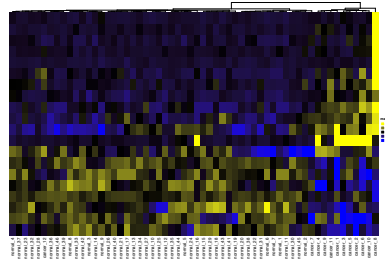

### 50 DMRs

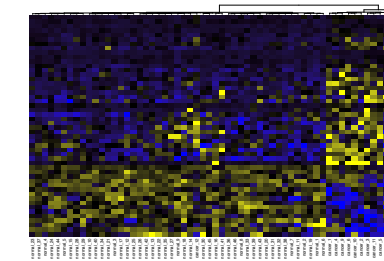

### 30 DMRs

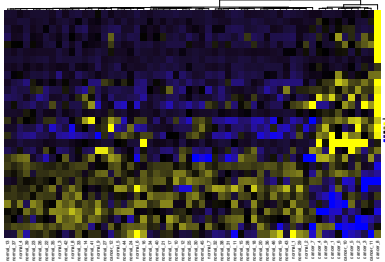

### 100 DMRs

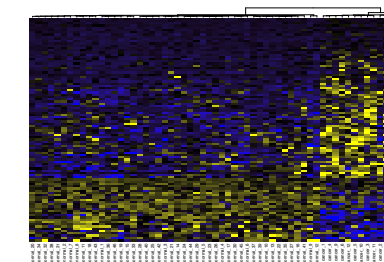

Supplement: NIHMS1738217-supplement-24.pdf [file NIHMS1738217-supplement-24.pdf]

# PDAC\_pitt

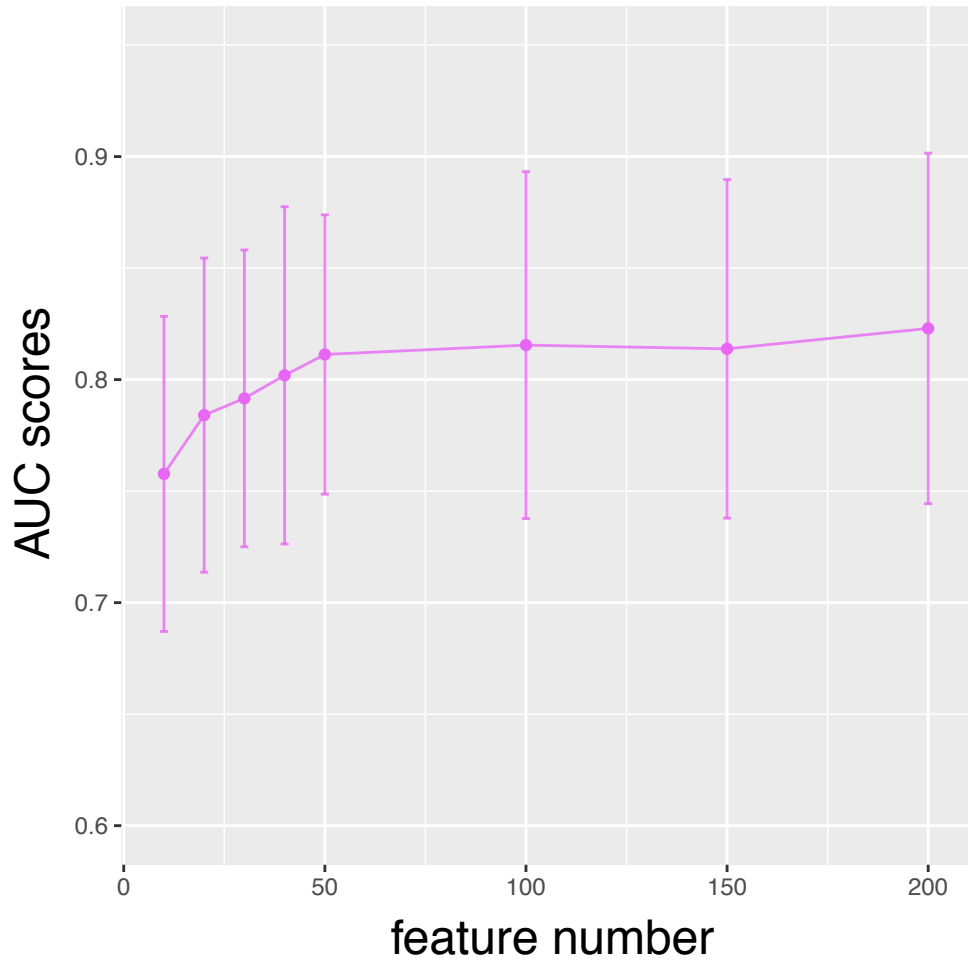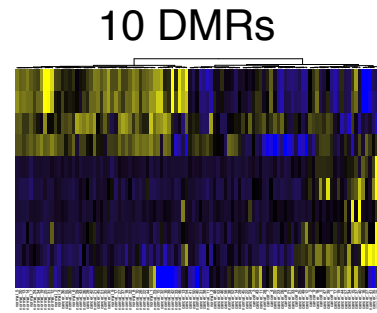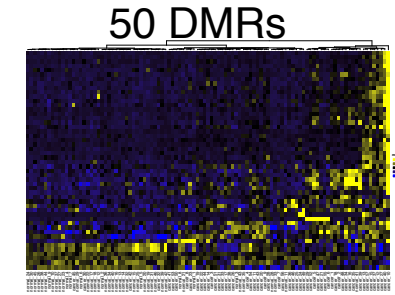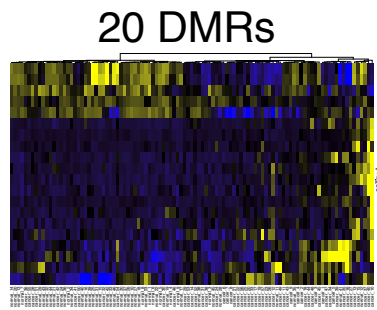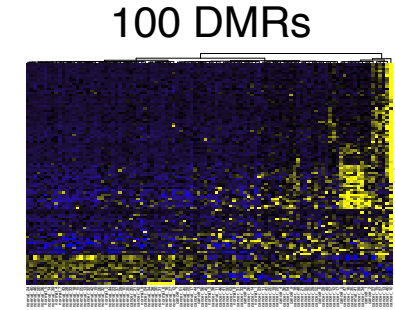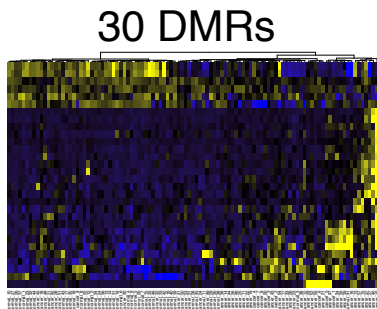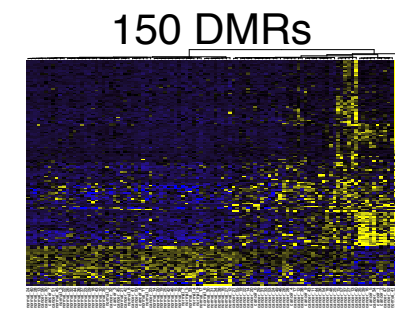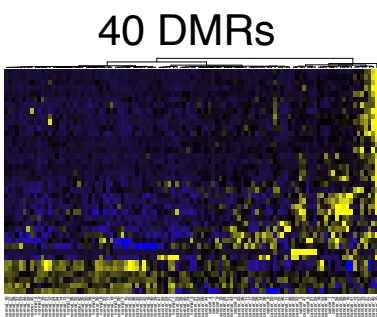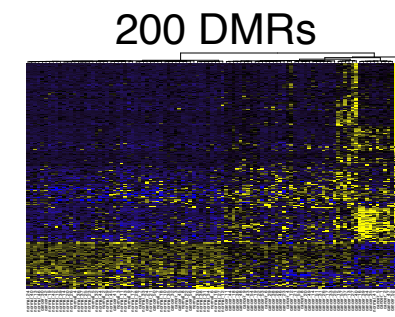

Supplement: NIHMS1738217-supplement-25.pdf [file NIHMS1738217-supplement-25.pdf]

# panGI

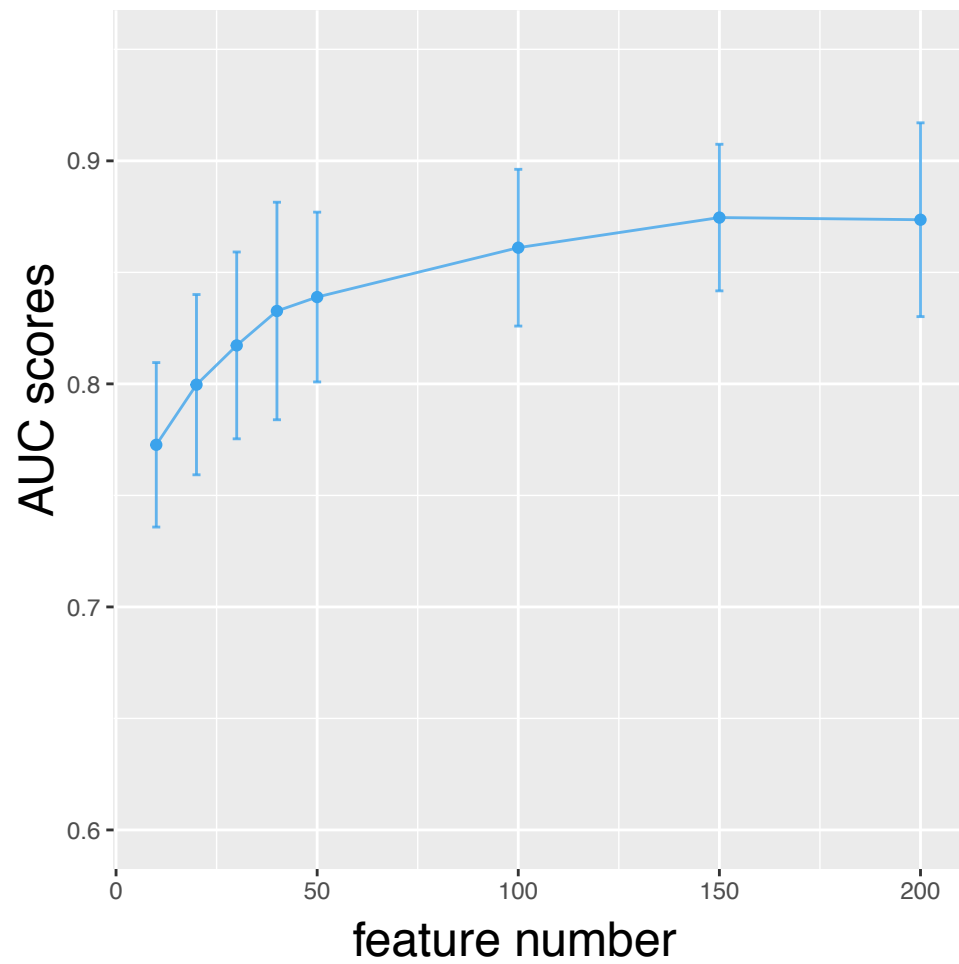

10 DMRs

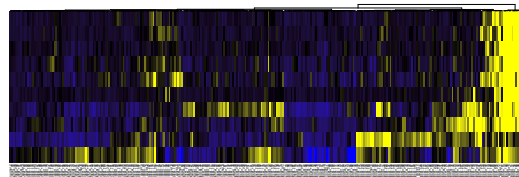

50 DMRs

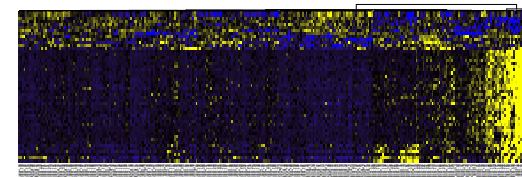

20 DMRs

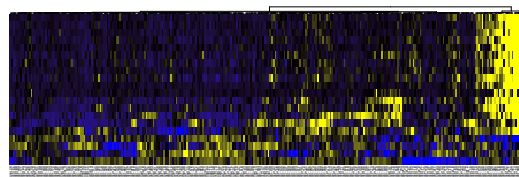

100 DMRs

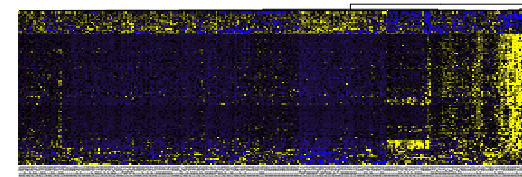

30 DMRs

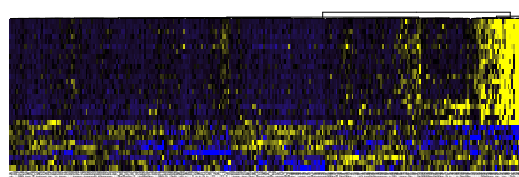

150 DMRs

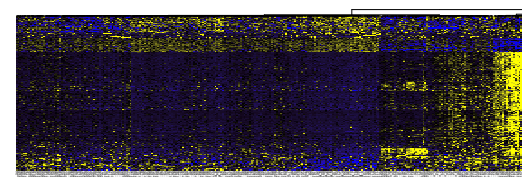

40 DMRs

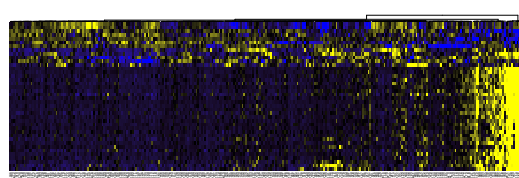

200 DMRs

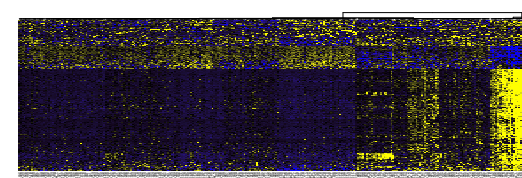

Supplement: NIHMS1738217-supplement-26.pdf [file NIHMS1738217-supplement-26.pdf]

# Multi-class (top)

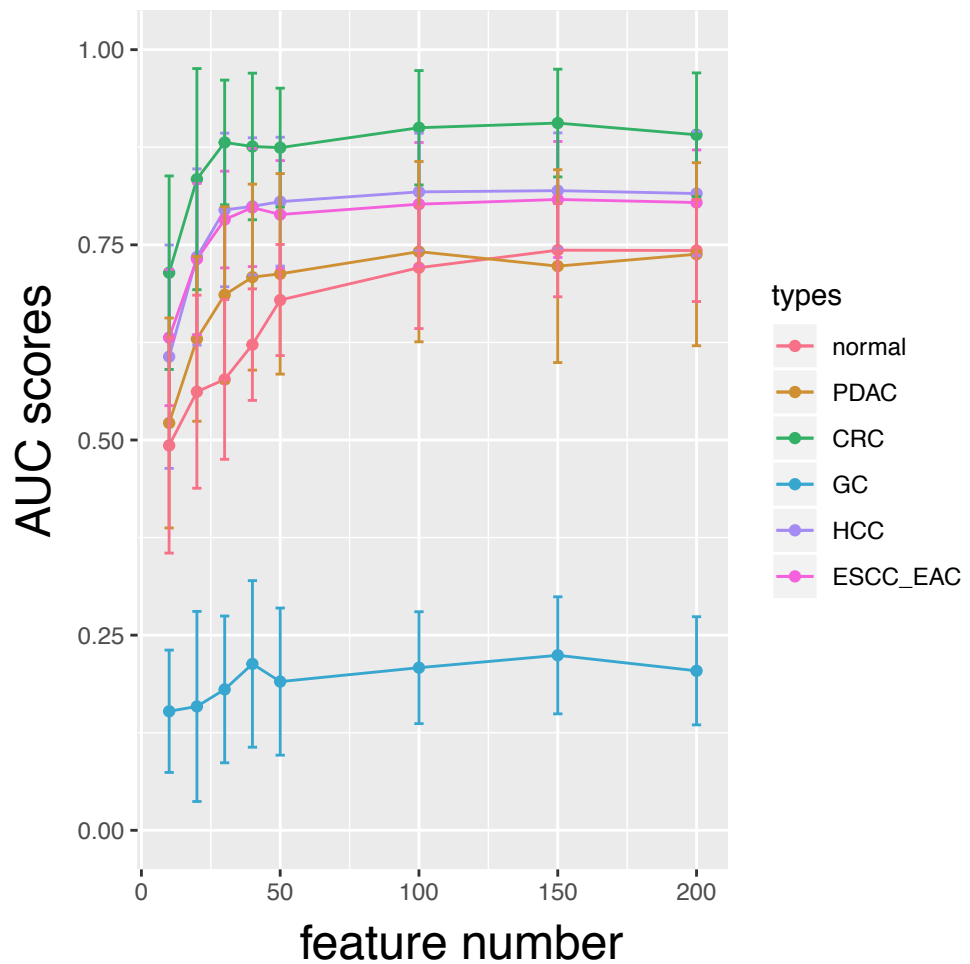

## 10 DMRs

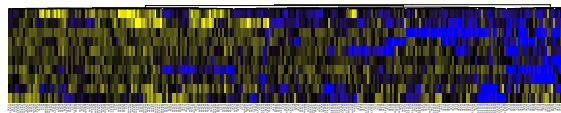

## 50 DMRs

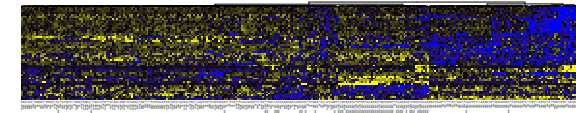

## 20 DMRs

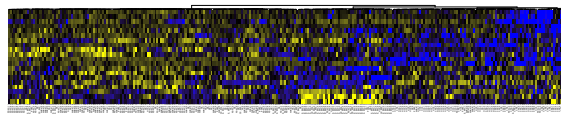

## 100 DMRs

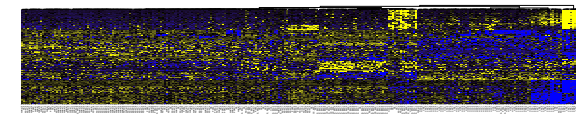

## 30 DMRs

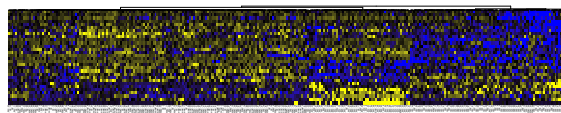

## 150 DMRs

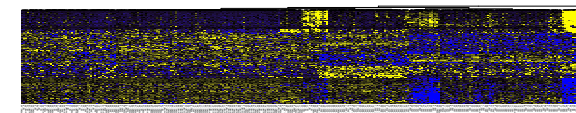

## 40 DMRs

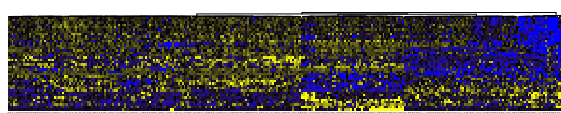

## 200 DMRs

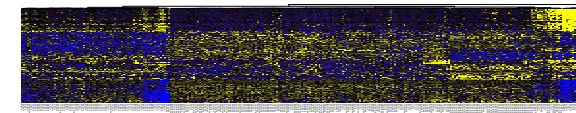

Supplement: NIHMS1738217-supplement-8.pdf [file NIHMS1738217-supplement-8.pdf]

# Multi-class (sec)

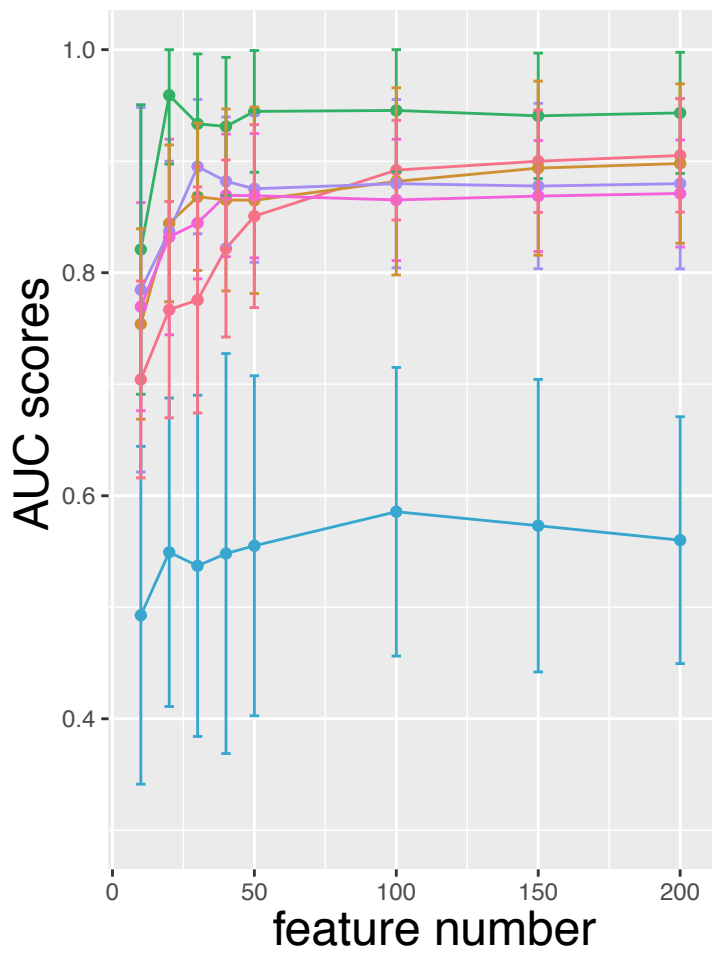

types

- normal
- PDAC
- CRC
- GC
- HCC
- ESCC\_EAC

10 DMRs

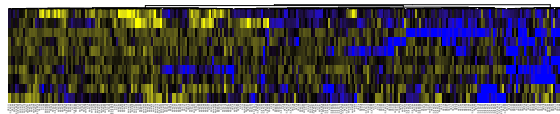

50 DMRs

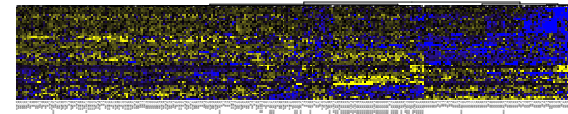

20 DMRs

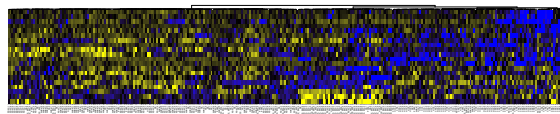

100 DMRs

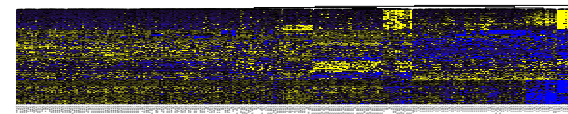

30 DMRs

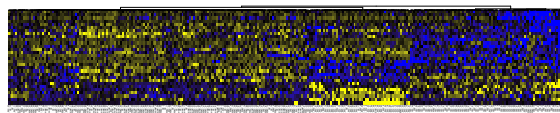

150 DMRs

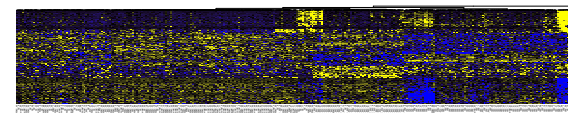

40 DMRs

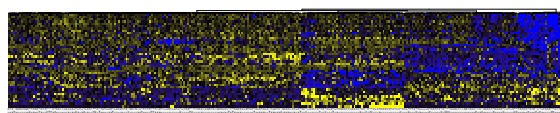

200 DMRs

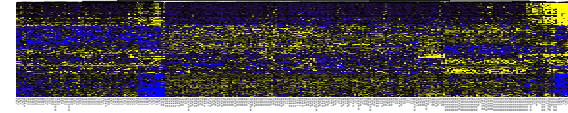

Supplement: NIHMS1738217-supplement-9.pdf [file NIHMS1738217-supplement-9.pdf]
